# Supplementary material
Source: publisher figshare collection journal article supplement (https://sage.figshare.com/ndownloader/files/14026526)
Supplement: Supplementary file 1 [file 14026526]

**Supplement 1.** Pearson product-moment correlations of heart conditions and other variables in the study.

| <i>Variables</i> |                                          | Mean<br>(SD)     | 1       | 2       | 3      | 4    | 5      | 6      | 7      | 8      | 9      | 10 |
|------------------|------------------------------------------|------------------|---------|---------|--------|------|--------|--------|--------|--------|--------|----|
| 1.               | Heart conditions<br>at age 54            | .04<br>(.20)     | —       |         |        |      |        |        |        |        |        |    |
| 2.               | Sex                                      | .49<br>(.50)     | -.05*** | —       |        |      |        |        |        |        |        |    |
| 3.               | Parental social class<br>at birth        | 3.33<br>(1.24)   | -.03*   | -.03*   | —      |      |        |        |        |        |        |    |
| 4.               | Childhood heart<br>problems by age 7     | .01<br>(.10)     | .06***  | -.02    | -.02   | —    |        |        |        |        |        |    |
| 5.               | Childhood cognitive<br>ability at age 11 | 103.8<br>(12.88) | -.05*** | .05***  | -.01   | -.01 | —      |        |        |        |        |    |
| 6.               | Educational<br>qualifications at age 33  | 2.68<br>(1.45)   | -.02    | -.11    | -.01   | -.01 | .51*** | —      |        |        |        |    |
| 7.               | Occupational levels<br>at age 54         | 4.08<br>(1.23)   | -.01    | -.01    | .22*** | -.01 | .34*** | .46*** | —      |        |        |    |
| 8.               | Extraversion<br>At age 50                | 29.43<br>(6.61)  | -.03*   | .06***  | .03*   | .01  | .04*   | .08*** | .14*** | —      |        |    |
| 9.               | Conscientiousness<br>at age 50           | 34.04<br>(5.19)  | -.04**  | .09***  | .02    | -.02 | .05*** | .07*** | .08*** | .16*** | —      |    |
| 10.              | Emotional stability<br>at age 50         | 29.11<br>(7.04)  | -.06*** | -.15*** | .04*   | .01  | .09*** | .10*** | .07*** | .23*** | .20*** | —  |

*Note.* Variables were scored such that a higher score indicated being female, a higher score on the prevalence of heart conditions in childhood and adulthood, a more professional occupation for parents and cohort members, higher scores on childhood cognitive ability, highest educational qualifications, a higher score on adulthood extraversion, conscientiousness, and emotional stability.

\* $p < .05$ ; \*\* $p < .01$ ; \*\*\* $p < .001$ .
